# Supplementary material for: High-Resolution Mapping of Seaweed Aquaculture along the Jiangsu Coast of China Using Google Earth Engine (2016–2022)
Source: MDPI journal article supplement (doi:10.3390/rs14246202), 2022-12-07
Supplement: s1 [file s1]

## Supplementary Materials

*Article*

# High-Resolution Mapping of Seaweed Aquaculture along the Jiangsu Coast of China Using Google Earth Engine (2016–2022)

Jie Cheng <sup>1</sup>, Nan Jia <sup>2</sup>, Ruishan Chen <sup>1,3,\*</sup>, Xiaona Guo <sup>3</sup>, Jianzhong Ge <sup>4</sup> and Fucang Zhou <sup>4</sup>

<sup>1</sup> School of Geographic Sciences, East China Normal University, Shanghai 200241, China; chengjie987777@gmail.com

<sup>2</sup> Center for Systems Integration and Sustainability, Department of Fisheries and Wildlife, Michigan State University, East Lansing, MI 48823, USA; jianan2@msu.edu

<sup>3</sup> School of Design, Shanghai Jiaotong University, Shanghai 200040, China; xiaonaguo2018@gmail.com

<sup>4</sup> State Key Laboratory of Estuarine and Coastal Research, East China Normal University, Shanghai 200241, China; jzge@sklec.ecnu.edu.cn (J.G.); 51193904016@stu.ecnu.edu.cn (F.Z.)

\* Correspondence: chenrsh04@gmail.com

| Level    | Type                 | The time of implementation or publication | File name                                                                                                                                  |
|----------|----------------------|-------------------------------------------|--------------------------------------------------------------------------------------------------------------------------------------------|
| State    | Laws and regulations | Dec.1994                                  | Regulations of the People's Republic of China on Nature Reserves                                                                           |
|          |                      | Jan.2002                                  | Law of the People's Republic of China on the Administration of the Use of Sea Areas                                                        |
|          | Plans                | Jun.2004                                  | National Wetland Protection Project Plan (2002-2030)                                                                                       |
|          |                      | Revise: Dec.2013                          | Fisheries Law of the People's Republic of China                                                                                            |
|          | Laws and regulations | Mar.2015                                  | Waterway Law of the People's Republic of China                                                                                             |
|          |                      | Mar.2021                                  | Yangtze River Protection Law of the People's Republic of China                                                                             |
|          |                      | Jun.2022                                  | Wetland Protection Law of the People's Republic of China                                                                                   |
| Province | Laws and regulations | Mar.2003                                  | Fisheries Management Regulations of Jiangsu Province                                                                                       |
|          | Plans                | Apr.2015                                  | Wetland Conservation Plan of Jiangsu Province (2015-2030)                                                                                  |
|          | Laws and regulations | Jan.2017                                  | Wetland Protection Regulations of Jiangsu Province                                                                                         |
|          | Suggestions          | May.2020                                  | Opinions of the General Office of the Jiangsu Provincial Government on Accelerating the Promotion of High-quality Development of Fisheries |
|          |                      |                                           | Planning of the National Ecological Protection Red Line in Jiangsu Province                                                                |
|          | Plans                | Jun.2020                                  | Jiangsu Province's "Three Lines and One List" Ecological Environment Zone Management and Control Plan                                      |
|          |                      | Jul.2018                                  | The planning of marine main functional zones in Jiangsu Province                                                                           |
|          | Suggestions          | Nov.2021                                  | Opinions on Accelerating the Healthy Development of the Seaweed Industry                                                                   |
|          |                      | Aug.2021                                  | The 14th Five-Year Plan for Marine Economic Development in Jiangsu Province                                                                |
|          | Plans                | Jan.2022                                  | Planning of ecological space management and control areas in Jiangsu Province                                                              |
|          |                      | Jan.2022                                  | Tidal Flat Plan for Aquaculture Waters in Jiangsu Province (2020-2030)                                                                     |
|          |                      | Mar.2022                                  | The 14th Five-Year Plan for Marine Ecological Environmental Protection in Jiangsu Province                                                 |
| Cities   | Plans                | Sep.2017                                  | Aquaculture Waters Tidal Flat Planning (2016-2030) in Lianyungang City                                                                     |
|          |                      | Sep.2020                                  | Aquaculture Waters Tidal Flat Planning (2019-2030) in Nantong City                                                                         |
|          |                      | Jan.2021                                  | Aquaculture Waters Tidal Flat Planning (2021-2030) in                                                                                      |
